# Supplementary material for: Development of a Machine Learning Model to Distinguish between Ulcerative Colitis and Crohn’s Disease Using RNA Sequencing Data
Source: MDPI journal article supplement (doi:10.3390/diagnostics11122365), 2021-12-15
Supplement: s1 [file s1]

**Supplemental table S1.** Demographic information of human material

|                                          | Patients with CD<br>(n=94) | Patients with UC<br>(n=33) |
|------------------------------------------|----------------------------|----------------------------|
| Male                                     | 66 (77.6%)                 | 19 (22.4%)                 |
| Age, median years (range)                | 30 (18-68)                 | 48 (18-69)                 |
| Disease duration, median<br>year (range) | 4 (0-22)                   | 4 (0-24)                   |
| <b>Current drug use</b>                  |                            |                            |
| 5'-ASA                                   | 55 (58.5%)                 | 21 (63.6%)                 |
| Glucocorticoids                          | 7 (7.4%)                   | 4 (12.1%)                  |
| Immunomodulator                          | 45 (47.9%)                 | 4 (12.1%)                  |
| Anti-TNF                                 | 28 (29.8%)                 | 3 (9.1%)                   |
| Other biologics                          | 9 (9.6%)                   | 2 (6.1%)                   |
| <b>Smoking history</b>                   |                            |                            |
| Current smoker                           | 12 (12.8%)                 | 4 (12.5%)                  |
| Past smoker                              | 17 (18.1%)                 | 7 (21.9%)                  |
| Never                                    | 65 (69.1%)                 | 21 (65.6%)                 |
| <b>Biopsy location</b>                   |                            |                            |
| <b>Normal</b>                            |                            |                            |
| Terminal ileum                           | 52 (80.0%)                 | 0                          |
| Ascending colon                          | 8 (12.3%)                  | 0                          |
| Transverse colon                         | 2 (3.1%)                   | 0                          |

|                  |            |            |
|------------------|------------|------------|
| Descending colon | 2 (3.1%)   | 0          |
| Sigmoid colon    | 0          | 1 (7.7%)   |
| Rectum           | 1 (1.5%)   | 12 (92.3%) |
| <b>Inflamed</b>  |            |            |
| Terminal ileum   | 10 (34.5%) | 0          |
| Ascending colon  | 13 (44.8%) | 1 (5.0%)   |
| Transverse colon | 0          | 0          |
| Descending colon | 2 (6.9%)   | 0          |
| Sigmoid colon    | 3 (10.3%)  | 5 (25.0%)  |
| Rectum           | 1 (3.4%)   | 14 (70.0%) |

CD = Crohn's disease, UC = ulcerative colitis, 5'-ASA= 5-aminosalicylic acid, TNF= tumour necrosis factor.
